# Supplementary material for: BMP8A promotes malignant advancement of gastric cancer by regulating MMP2
Source: Research Square preprint supplement (doi:10.21203/rs.3.rs-8223947/v1), 2025-12-08

Gels and Blots image(s) supplementary materials

Fig2. Levels of BMP8A mRNA and protein in three designated cell lines.


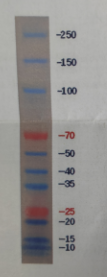

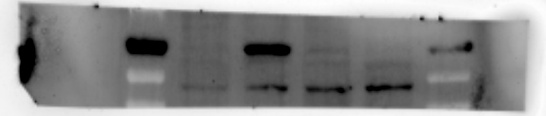

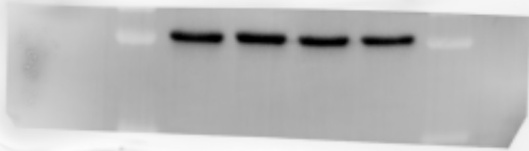

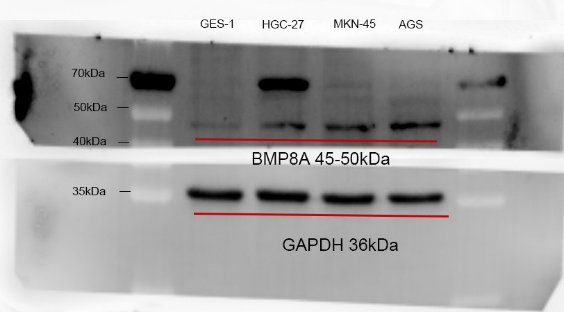


Fig2. protein expression of BMP8A in transfected cell HGC-27 and Fig3. protein expression of BMP8A in transfected cell GAS.


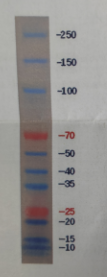


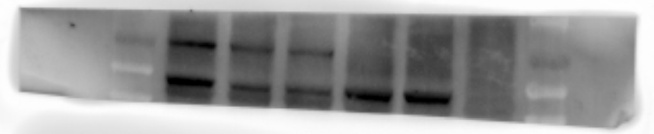


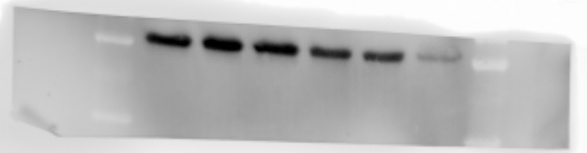

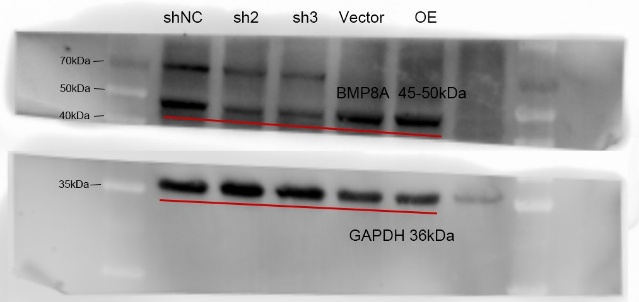


Fig2. protein expression of BMP8A in transfected cell MKN-45.

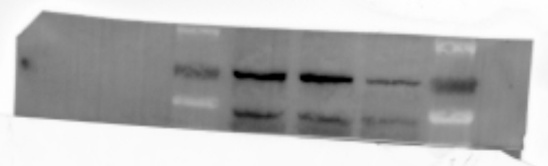

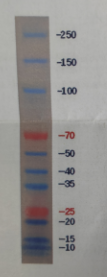

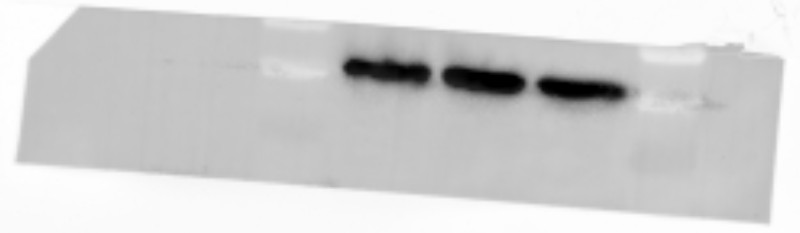

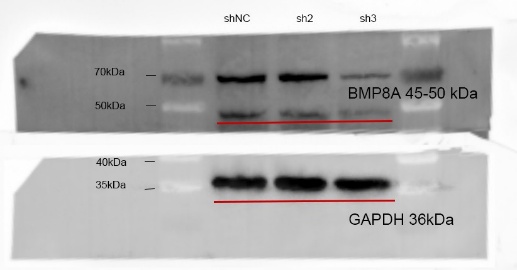


Fig4.protein expression of MMP2 and MMP14 in HGC-27 cells with BMP8A knockdown.


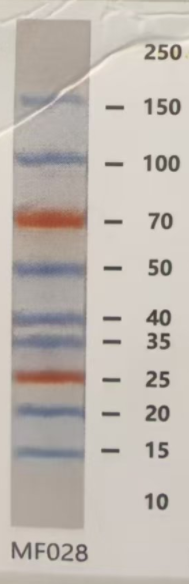


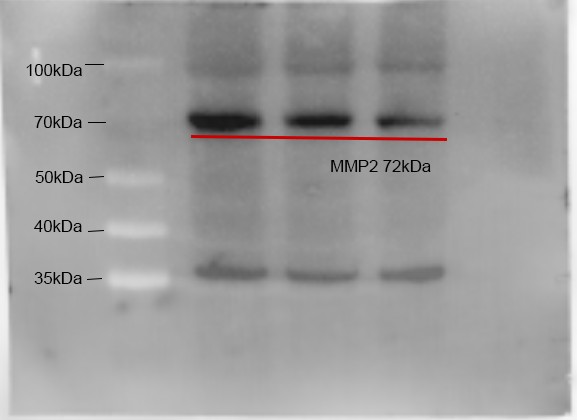

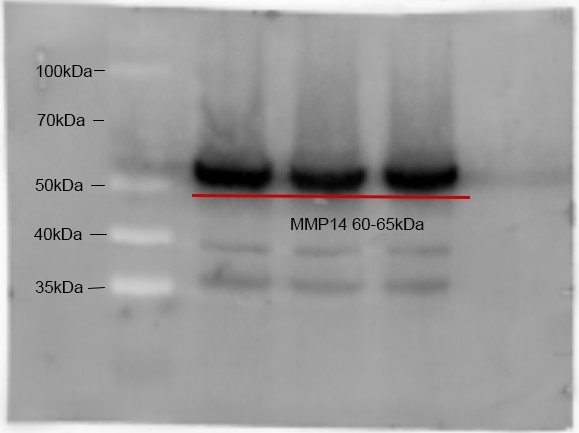

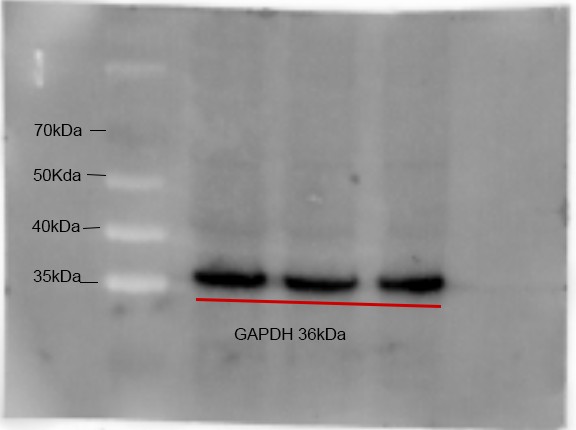


Fig4.protein expression of MMP2 and MMP14 in MKN-45 cells with BMP8A. knockdown


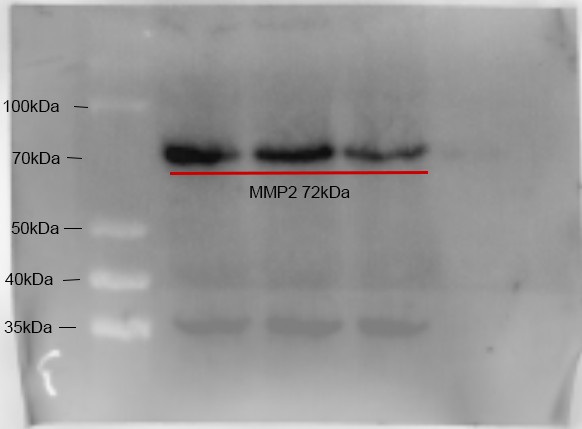

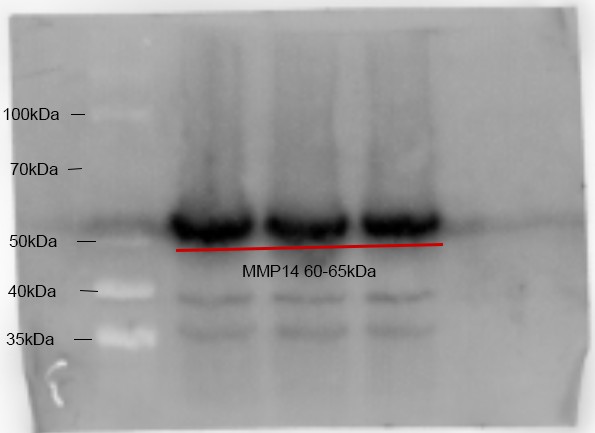

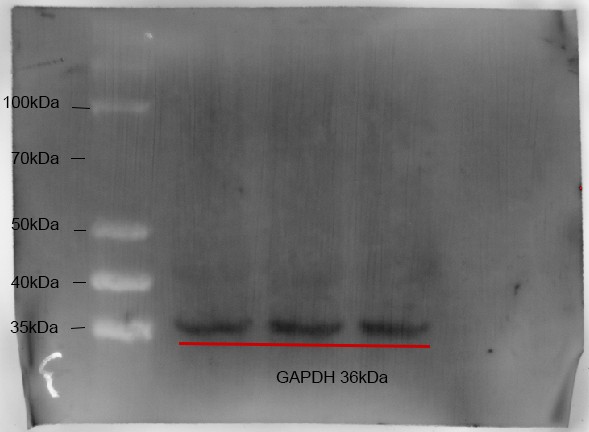


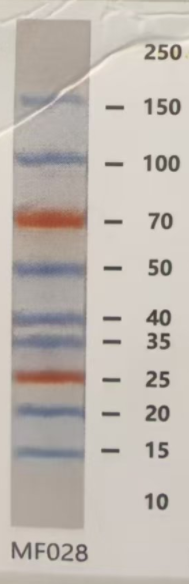


Fig4.protein expression levels of MMP2 and MMP14 in AGS cells with BMP8A overexpression.


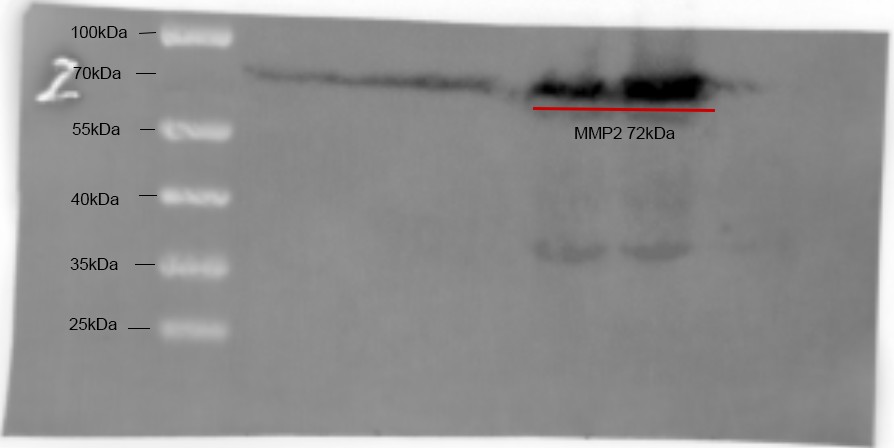

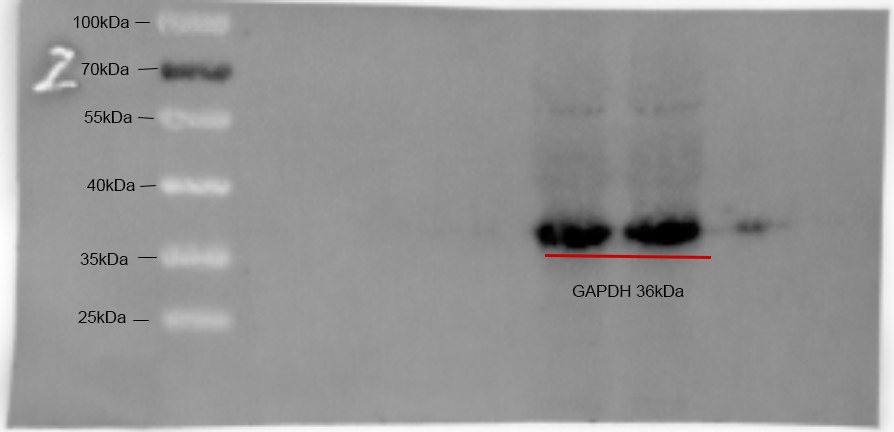

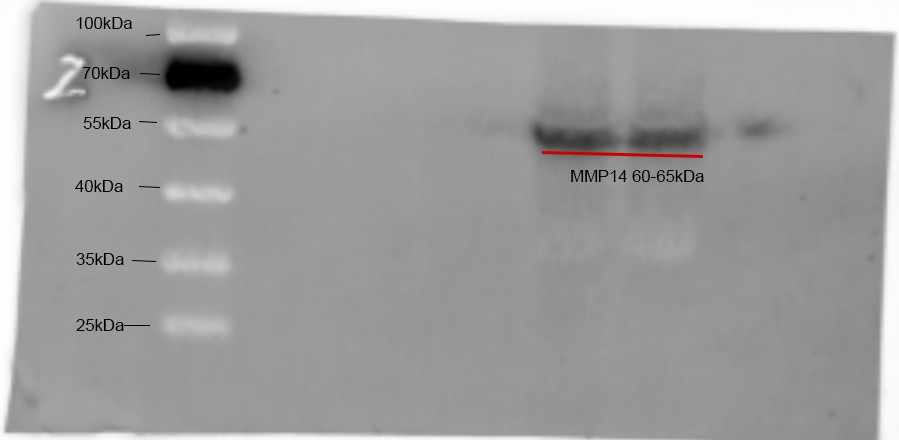


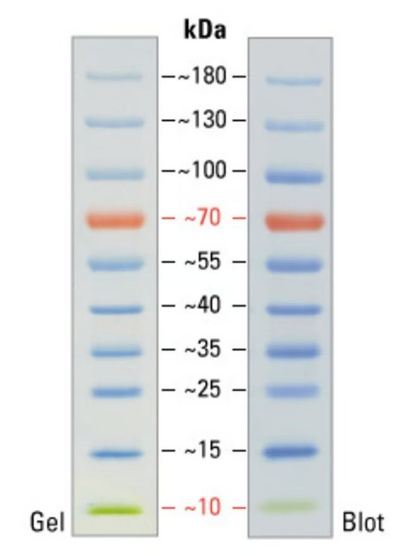

Supplement: Supplementary file 2 [file c6da6459b16508fa635eb323.docx]
