# Supplementary material for: BMP8A promotes malignant advancement of gastric cancer by regulating MMP2
Source: Research Square preprint supplement (doi:10.21203/rs.3.rs-8223947/v1), 2025-12-08
Supplement: Supplementary file 1 [file 0fff493256bab6784e816d98.docx]

**A**


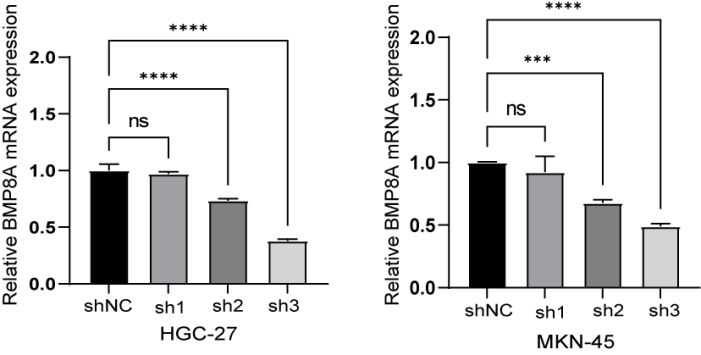


**Fig.S1A：**Three different short hairpin RNA sequences were respectively transfected into the HGC-27 and MKN-45 cell lines, and the expression level of BMP8A mRNA was detected afterwards.
